# Supplementary material
Source: publisher site journal article supplement (https://www.dovepress.com/article/248171)
Supplement: Supplementary file 1 [file get_supplementary_file.php]

Supplementary Table 1 Modified Observer’s Assessment of Alertness/Sedation.

| MOAA/S score | Description | ASA continuum |
| --- | --- | --- |
| 5 | Responds readily to name spoken in normal tone (awake) | Minimal sedation |
| 4 | Lethargic response to name spoken in normal tone | Moderate sedation |
| 3 | Responds after name called loudly or repeatedly | Moderate sedation |
| 2 | Purposeful response to mild prodding or mild shaking | Moderate sedation |
| 1 | Responds to trapezius squeeze (includes purposeful and reflexive withdrawal) | Deep sedation |
| 0 | No response to painful stimulus (trapezius squeeze) | General anaesthesia |

**Abbreviations:** MOAA/S, Modified Observer’s Assessment of Alertness/Sedation; ASA, American Society of Anaesthesiologists.
